# Supplementary material
Source: PubMed Central journal article supplement (PMC4357954)
Supplement: AEM.04054-14_zam999116152so1.pdf [file AEM.04054-14_zam999116152so1.pdf]

1 Supplementary Figure Legends:

2 Supplementary Table 1: Summary of reads generated for each individual sample, at  
3 Phylum, Family and Genus level, post quality filtering.

4  
5 Supplementary Table 2: Summary of read percentages and relative abundances, at  
6 Phylum, Family and Genus level, for early and late day production continental-type  
7 cheese (Early Day [ED], Late Day [LD]). Results depicted are mean values of reads  
8 generated from individual core/rind samples from each respective cheese block and  
9 were standardised to equi-molar concentrations prior to library preparation.

10

11 Supplementary Table 3: Summary of read percentages and relative abundances, at  
12 genus level, for core and rind samples of continental-type cheese (Early Day [ED],  
13 Late Day [LD]). Results depicted are mean values of reads generated from individual  
14 core/rind samples from each respective cheese block and were standardised to equi-  
15 molar concentrations prior to library preparation.

16

17 Supplementary Figures:

18 Supplementary Figure 1: Rarefaction curves of microbial populations using the  
19 Shannon, Simpson and Chao1 indices

20

21 Supplementary Figure 2: Relative abundance of individual samples at genus level for  
22 a Continental-type cheese produced early and late (ED and LD) in the production day

23 Supplementary Table 1

|               | <b>TP1, LD, B1,<br/>Rind</b> | <b>TP1, LD, B2,<br/>Rind</b> | <b>TP1, LD, B1,<br/>Core</b> | <b>TP1, LD, B2,<br/>Core</b> | <b>TP1, ED, B1,<br/>Rind</b> | <b>TP1, ED, B2,<br/>Rind</b> | <b>TP1, ED, B1,<br/>Core</b> | <b>TP1, ED, B2,<br/>Core</b> | <b>Total</b> |
|---------------|------------------------------|------------------------------|------------------------------|------------------------------|------------------------------|------------------------------|------------------------------|------------------------------|--------------|
| <b>Phylum</b> | 13736                        | 9403                         | 6724                         | 7422                         | 14682                        | 10614                        | 9204                         | 15371                        | 87156        |
| <b>Family</b> | 13649                        | 9327                         | 6669                         | 7352                         | 14618                        | 10562                        | 9174                         | 15322                        | 86673        |
| <b>Genus</b>  | 13548                        | 9202                         | 6575                         | 7127                         | 14297                        | 10157                        | 8713                         | 14884                        | 84503        |
|               | <b>TP2, LD, B1,<br/>Rind</b> | <b>TP2, LD, B2,<br/>Rind</b> | <b>TP2, LD, B1,<br/>Core</b> | <b>TP2, LD, B2,<br/>Core</b> | <b>TP2, ED, B1,<br/>Rind</b> | <b>TP2, ED, B2,<br/>Rind</b> | <b>TP2, ED, B1,<br/>Core</b> | <b>TP2, ED, B2,<br/>Core</b> |              |
| <b>Phylum</b> | 16797                        | 11854                        | 11097                        | 18525                        | 16528                        | 5690                         | 7248                         | 9306                         | 97045        |
| <b>Family</b> | 16746                        | 11794                        | 11080                        | 18484                        | 16485                        | 5663                         | 7231                         | 9247                         | 96730        |
| <b>Genus</b>  | 16521                        | 11518                        | 10912                        | 18168                        | 16374                        | 5549                         | 7162                         | 9161                         | 95365        |
|               | <b>TP3, LD, B1,<br/>Rind</b> | <b>TP3, LD, B2,<br/>Rind</b> | <b>TP3, LD, B1,<br/>Core</b> | <b>TP3, LD, B2,<br/>Core</b> | <b>TP3, ED, B1,<br/>Rind</b> | <b>TP3, ED, B2,<br/>Rind</b> | <b>TP3, ED, B1,<br/>Core</b> | <b>TP3, ED, B2,<br/>Core</b> |              |
| <b>Phylum</b> | 8694                         | 6553                         | 11510                        | 5735                         | 5604                         | 6015                         | 9528                         | 8609                         | 62248        |
| <b>Family</b> | 8672                         | 6547                         | 11500                        | 5727                         | 5579                         | 5988                         | 9508                         | 8554                         | 62075        |
| <b>Genus</b>  | 8192                         | 6327                         | 11403                        | 5655                         | 5435                         | 5679                         | 9465                         | 8442                         | 60598        |
|               | <b>TP4, LD, B1,<br/>Rind</b> | <b>TP4, LD, B2,<br/>Rind</b> | <b>TP4, LD, B1,<br/>Core</b> | <b>TP4, LD, B2,<br/>Core</b> | <b>TP4, ED, B1,<br/>Rind</b> | <b>TP4, ED, B2,<br/>Rind</b> | <b>TP4, ED, B1,<br/>Core</b> | <b>TP1, ED, B2,<br/>Core</b> |              |
| <b>Phylum</b> | 6885                         | 7484                         | 4651                         | Sequencing<br>Failed         | 5295                         | 7942                         | 6671                         | 9476                         | 48404        |
| <b>Family</b> | 6869                         | 7469                         | 4627                         |                              | 5279                         | 7907                         | 6638                         | 9450                         | 48239        |
| <b>Genus</b>  | 6817                         | 7419                         | 4474                         |                              | 5205                         | 7830                         | 6515                         | 9346                         | 47606        |

24

25 Supplementary Table 1: Summary of reads generated for each individual sample, at Phylum, Family and Genus level, post quality filtering

**Supplementary Table 2:**

| <b>Phylum (%)</b>              | <b>TP1 ED</b> | <b>TP1 LD</b> | <b>TP2 ED</b> | <b>TP2 LD</b> | <b>TP3 ED</b> | <b>TP3 LD</b> | <b>TP4 ED</b> | <b>TP4 LD</b> |
|--------------------------------|---------------|---------------|---------------|---------------|---------------|---------------|---------------|---------------|
| <i>Proteobacteria</i>          | 2.14          | 3.02          | 0.61          | 0.33          | 1.50          | 0.46          | 0.25          | 0.28          |
| <i>Bacteroidetes</i>           | 0.08          | 0.25          | 0             | 0.06          | 0             | 0             | 0             | 0.04          |
| <i>Actinobacteria</i>          | 0.07          | 0.17          | 0.02          | 0.01          | 0.04          | 0.03          | 0             | 0             |
| <i>Firmicutes</i>              | 97.53         | 85.56         | 99.33         | 83.96         | 93.46         | 76.62         | 99.75         | 75.26         |
| <i>Deinococcus-Thermus</i>     | 0.18          | 10.99         | 0.04          | 15.64         | 5.01          | 22.89         | 0             | 24.42         |
| <b>Relative Abundance (%)</b>  | 100           | 100           | 100           | 100           | 100           | 100           | 100           | 100           |
| <b>Family (%)</b>              | <b>TP1 ED</b> | <b>TP1 LD</b> | <b>TP2 ED</b> | <b>TP2 LD</b> | <b>TP3 ED</b> | <b>TP3 LD</b> | <b>TP4 ED</b> | <b>TP4 LD</b> |
| <i>Pseudoalteromonadaceae:</i> | 0.07          | 0.22          | 0.03          | 0.01          | 0.09          | 0.02          | 0             | 0             |
| <i>Moraxellaceae:</i>          | 0.80          | 1.45          | 0.26          | 0.11          | 0.73          | 0.21          | 0.05          | 0.10          |
| <i>Vibrionaceae:</i>           | 0.53          | 1.25          | 0.11          | 0.10          | 0.41          | 0.14          | 0.03          | 0.09          |
| <i>Brevibacteriaceae:</i>      | 0             | 0.01          | 0             | 0             | 0             | 0             | 0             | 0             |
| <i>Micrococcaceae:</i>         | 0.07          | 0.13          | 0.02          | 0.01          | 0.03          | 0             | 0             | 0             |
| <i>Corynebacteriaceae:</i>     | 0             | 0.01          | 0             | 0             | 0             | 0             | 0             | 0             |
| <i>Streptococcaceae:</i>       | 32.59         | 18.57         | 24.03         | 12.35         | 18.50         | 9.34          | 27.06         | 13.70         |
| <i>Lactobacillaceae:</i>       | 64.42         | 63.51         | 74.61         | 68.76         | 72.62         | 65.44         | 69.10         | 59.77         |
| <i>Staphylococcaceae:</i>      | 0             | 0             | 0.35          | 0.66          | 0             | 0             | 0             | 0             |
| <i>Lachnospiraceae:</i>        | 0.06          | 0.01          | 0.01          | 0             | 0.14          | 0.15          | 0.14          | 0.62          |
| <i>Ruminococcaceae:</i>        | 0.03          | 0             | 0.01          | 0             | 0.04          | 0.07          | 0.05          | 0.19          |
| <i>Thermaceae</i>              | 0.18          | 10.99         | 0.04          | 15.64         | 5.01          | 22.89         | 0             | 24.42         |
| <i>Pseudomonadaceae</i>        | 0.26          |               | 0.03          | 0             | 0             | 0             | 0             | 0             |
| <i>Leuconostocaceae</i>        | 0.08          | 0.01          | 0             | 0             | 0.26          | 0.02          | 0             | 0             |

|                               |               |               |               |               |               |               |               |               |
|-------------------------------|---------------|---------------|---------------|---------------|---------------|---------------|---------------|---------------|
| <i>Enterobacteriaceae</i>     | 0.06          |               | 0             | 0             | 0             | 0.03          | 0             | 0             |
| <i>Flavobacteriaceae</i>      | 0.08          | 0.25          | 0             | 0.05          | 0             | 0             | 0             | 0             |
| <i>Bacillaceae</i>            | 0             | 3.20          | 0             | 1.49          | 0.11          | 0.65          | 0             | 0.42          |
| <i>Clostridiaceae</i>         | 0             | 0             | 0.12          | 0.53          | 1.64          | 0.87          | 3.20          | 0.38          |
| <i>Bifidobacteriaceae</i>     | 0             | 0             | 0             | 0             | 0             | 0.03          | 0             | 0             |
| <i>Acetobacteraceae</i>       | 0             | 0             | 0             | 0             | 0             | 0             | 0             | 0.03          |
| Unassigned                    | 0.77          | 0.39          | 0.38          | 1.06          | 0.43          | 0.14          | 0.37          | 0.29          |
| <b>Relative Abundance (%)</b> | <b>99.23</b>  | <b>99.23</b>  | <b>99.62</b>  | <b>99.71</b>  | <b>99.57</b>  | <b>99.86</b>  | <b>99.63</b>  | <b>99.71</b>  |
| <b>Genus (%)</b>              | <b>TP1 ED</b> | <b>TP1 LD</b> | <b>TP2 ED</b> | <b>TP2 LD</b> | <b>TP3 ED</b> | <b>TP3 LD</b> | <b>TP4 ED</b> | <b>TP4 LD</b> |
| <i>Pseudoalteromonas:</i>     | 0.0697        | 0.2166        | 0.0335        | 0.0137        | 0.0907        | 0.02          | 0             | 0             |
| <i>Psychrobacter:</i>         | 0.4881        | 1.4457        | 0.2295        | 0.1047        | 0.7091        | 0.21          | 0.0374        | 0.0894        |
| <i>Vibrio:</i>                | 0.5257        | 1.2352        | 0.1057        | 0.0995        | 0.4134        | 0.14          | 0.0272        | 0.0894        |
| <i>Brevibacterium:</i>        | 0             | 0.0120        | 0             | 0             | 0             | 0             | 0             | 0             |
| <i>Arthrobacter:</i>          | 0.0697        | 0.1283        | 0.0232        | 0.0103        | 0.0302        | 0             | 0             | 0             |
| <i>Corynebacterium:</i>       | 0             | 0.0120        | 0             | 0             | 0             | 0             | 0             | 0             |
| <i>Streptococcus:</i>         | 31.1788       | 18.3072       | 23.0914       | 12.2715       | 17.3746       | 9.26          | 26.0686       | 13.6225       |
| <i>Lactococcus:</i>           | 0.1180        | 0.2346        | 0.0800        | 0.0618        | 0.2924        | 0.04          | 0.1225        | 0.0421        |
| <i>Lactobacillus:</i>         | 64.4227       | 63.5119       | 74.5100       | 68.5789       | 71.7267       | 63.71         | 68.9729       | 59.5899       |
| <i>Staphylococcus:</i>        | 0             | 0             | 0.3508        | 0.6590        | 0             | 0             | 0             | 0             |
| <i>Thermus:</i>               | 0.1797        | 10.9883       | 0.0413        | 15.6436       | 5.0074        | 22.89         | 0             | 24.4217       |
| <i>Acinetobacter</i>          | 0.3031        | 0             | 0.0206        | 0             | 0             | 0             | 0             | 0             |
| <i>Pseudomonas</i>            | 0.2575        | 0             | 0.0310        | 0             | 0             | 0             | 0             | 0             |
| <i>Leuconostoc</i>            | 0.0751        | 0.0100        | 0             | 0             | 0             | 0             | 0             | 0             |

|                                      |         |         |         |         |         |       |         |         |
|--------------------------------------|---------|---------|---------|---------|---------|-------|---------|---------|
| <i>Flavobacterium</i>                | 0.0778  | 0.2486  | 0       | 0.0480  | 0       | 0     | 0       | 0       |
| <i>Clostridium</i>                   | 0       | 0       | 0.1135  | 0.5285  | 1.6333  | 0.87  | 3.0901  | 0.3733  |
| <i>Ruminococcaeae Incertae Sedis</i> | 0       | 0       | 0.0129  | 0       | 0       | 0     | 0.0204  | 0.1104  |
| <i>Bifidobacterium</i>               | 0       | 0       | 0       | 0       | 0       | 0.03  | 0       | 0       |
| <i>Weisella</i>                      | 0       | 0       | 0       | 0       | 0.2521  | 0.02  | 0       | 0       |
| <i>EU622674</i>                      | 0       | 0       | 0       | 0       | 0       | 0     | 0       | 0.0315  |
| Unassigned                           | 2.2341  | 3.6494  | 1.3566  | 1.9803  | 2.4701  | 2.82  | 1.6608  | 1.6299  |
| <b>Relative Abundance (%)</b>        | 97.7659 | 96.3506 | 98.6434 | 98.0197 | 97.5299 | 97.18 | 98.3392 | 98.3701 |

26 Supplementary Table 2: Summary of read percentages and relative abundances, at Phylum, Family and Genus level, for early and late day  
27 production continental-type cheese (Early Day [ED], Late Day [LD]). Results depicted are mean values of reads generated from individual  
28 core/rind samples from each respective cheese block and were standardised to equi-molar concentrations prior to library preparation.

29  
30  
31  
32  
33  
34  
35  
36  
37

| Genus (%)                | TP1 ED | TP1 ED | TP1 LD | TP1 LD | TP2 ED | TP2 ED | TP2 LD | TP2 LD | TP3 ED | TP3 ED | TP3 LD | TP3 LD | TP4 ED | TP4 ED | TP4 LD | TP4 LD |
|--------------------------|--------|--------|--------|--------|--------|--------|--------|--------|--------|--------|--------|--------|--------|--------|--------|--------|
|                          | Core   | Rind   |
| <i>Pseudoalteromonas</i> | 0      | 0.112  | 0.028  | 0.399  | 0      | 0.059  | 0.027  | 0      | 0.149  | 0      | 0      | 0.033  | 0      | 0      | 0      | 0      |
| <i>Psychrobacter</i>     | 0      | 0.787  | 0.256  | 2.601  | 0.205  | 0.248  | 0.206  | 0      | 1.130  | 0.052  | 0.128  | 0.302  | 0.068  | 0      | 0.129  | 0.077  |
| <i>Vibrio</i>            | 0      | 0.847  | 0.187  | 2.253  | 0.060  | 0.140  | 0.196  | 0      | 0.678  | 0      | 0.081  | 0.203  | 0.050  | 0      | 0.194  | 0.056  |
| <i>Brevibacterium:</i>   | 0      | 0      | 0      | 0.024  | 0      | 0      | 0      | 0      | 0      | 0      | 0      | 0      | 0      | 0      | 0      | 0      |
| <i>Arthrobacter</i>      | 0      | 0.112  | 0.020  | 0.233  | 0      | 0.041  | 0.020  | 0      | 0.050  | 0      | 0      | 0      | 0      | 0      | 0      | 0      |
| <i>Corynebacterium</i>   | 0      | 0      | 0      | 0.024  | 0      | 0      | 0      | 0      | 0      | 0      | 0      | 0      | 0      | 0      | 0      | 0      |
| <i>Streptococcus</i>     | 23.215 | 36.047 | 13.400 | 23.075 | 19.011 | 26.132 | 5.898  | 18.861 | 9.268  | 30.028 | 6.153  | 12.783 | 11.086 | 44.345 | 5.289  | 16.320 |
| <i>Lactococcus</i>       | 0.163  | 0.091  | 0.057  | 0.407  | 0.060  | 0.095  | 0.064  | 0.059  | 0.342  | 0.215  | 0.052  | 0.033  | 0.111  | 0.136  | 0      | 0.056  |
| <i>Lactobacillus</i>     | 72.303 | 59.605 | 74.604 | 52.736 | 78.791 | 71.321 | 79.515 | 57.272 | 76.220 | 64.713 | 70.977 | 55.486 | 81.253 | 53.993 | 69.490 | 56.385 |
| <i>Staphylococcus</i>    | 0      | 0      | 0      | 0      | 0      | 0.612  | 0      | 1.340  | 0      | 0      | 0      | 0      | 0      | 0      | 0      | 0      |
| <i>Thermus</i>           | 0.276  | 0.121  | 7.438  | 14.437 | 0.060  | 0.027  | 11.164 | 20.275 | 8.215  | 0      | 19.884 | 26.281 | 0      | 0      | 19.093 | 26.147 |
| <i>Acinetobacter</i>     | 0.467  | 0.203  | 0      | 0      | 0.048  | 0      | 0      | 0      | 0      | 0      | 0      | 0      | 0      | 0      | 0      | 0      |
| <i>Pseudomonas</i>       | 0.339  | 0.207  | 0      | 0      | 0.072  | 0      | 0      | 0      | 0      | 0      | 0      | 0      | 0      | 0      | 0      | 0      |
| <i>Leuconostoc</i>       | 0.099  | 0.061  | 0      | 0      | 0      | 0      | 0      | 0      | 0      | 0      | 0      | 0      | 0      | 0      | 0      | 0      |
| <i>Flavobacterium</i>    | 0.000  | 0.125  | 0.028  | 0.463  | 0      | 0      | 0.041  | 0.056  | 0      | 0      | 0      | 0      | 0      | 0      | 0      | 0      |
| <i>Clostridium</i>       | 0      | 0      | 0      | 0      | 0.266  | 0      | 1.040  | 0      | 2.680  | 0      | 1.641  | 0      | 5.623  | 0      | 1.419  | 0      |
| <i>Ruminococcaeae</i>    |        |        |        |        |        |        |        |        |        |        |        |        |        |        |        |        |
| <i>Incertae Sedis</i>    | 0      | 0      | 0      | 0      | 0.030  | 0      | 0      | 0      | 0      | 0      | 0      | 0      | 0.037  | 0      | 0.452  | 0      |
| <i>Bifidobacterium</i>   | 0      | 0      | 0      | 0      | 0      | 0      | 0      | 0      | 0      | 0      | 0      | 0.066  | 0      | 0      | 0      | 0      |
| <i>Weisella</i>          | 0      | 0      | 0      | 0      | 0      | 0      | 0      | 0      | 0      | 0.645  | 0      | 0.039  | 0      | 0      | 0      | 0      |

|                      |        |        |        |        |        |        |        |        |        |        |        |        |        |        |        |        |
|----------------------|--------|--------|--------|--------|--------|--------|--------|--------|--------|--------|--------|--------|--------|--------|--------|--------|
| <i>EU622674</i>      | 0      | 0      | 0      | 0      | 0      | 0      | 0      | 0      | 0      | 0      | 0      | 0      | 0      | 0      | 0.129  | 0      |
| Unassigned           | 3.139  | 1.681  | 3.980  | 3.329  | 1.395  | 1.328  | 1.830  | 2.136  | 1.268  | 4.346  | 1.084  | 4.775  | 1.771  | 1.526  | 3.806  | 0.926  |
| <b>Relative</b>      |        |        |        |        |        |        |        |        |        |        |        |        |        |        |        |        |
| <b>Abundance (%)</b> | 96.861 | 98.319 | 96.020 | 96.671 | 98.605 | 98.672 | 98.170 | 97.864 | 98.732 | 95.654 | 98.916 | 95.225 | 98.229 | 98.474 | 96.194 | 99.074 |

40 Supplementary Table 3: Summary of read percentages and relative abundances, at genus level, for core and rind samples of continental-type  
41 cheese (Early Day [ED], Late Day [LD]). Results depicted are mean values of reads generated from individual core/rind samples from each  
42 respective cheese block and were standardised to equi-molar concentrations prior to library preparation.

Supplementary Figures:

Supplementary Figure 1:

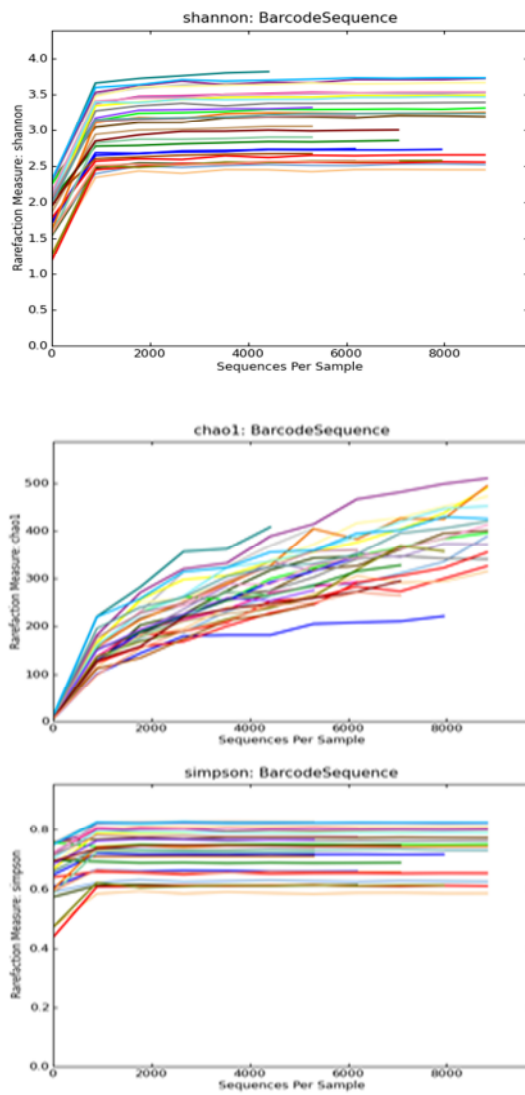

Supplementary Figure 1: Rarefaction curves of microbial populations using the Shannon, Simpson and Chao1 indices



Supplementary Figure 2:

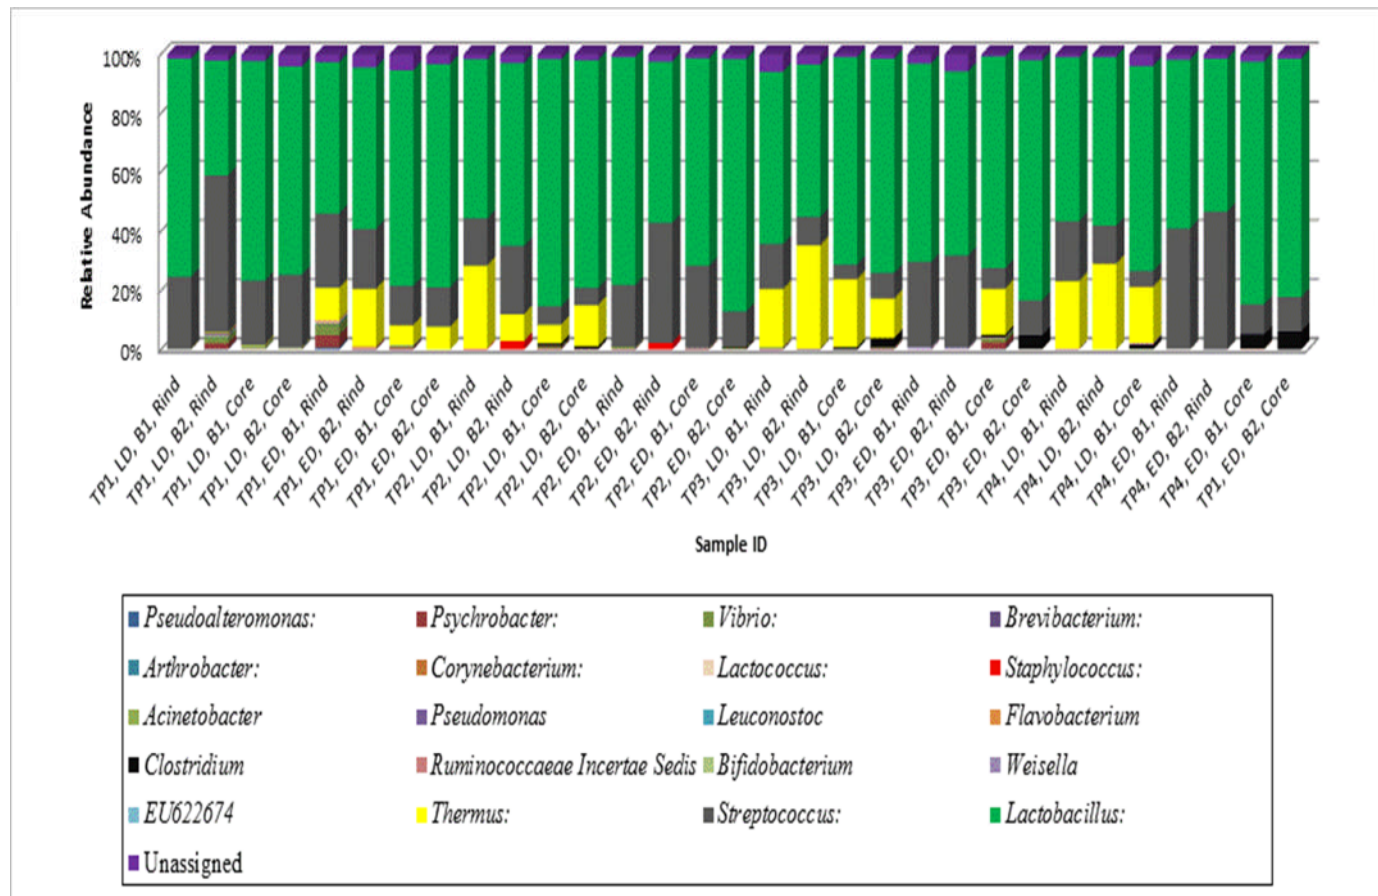

Supplementary Figure 2: Relative abundance of individual samples at genus level for a Continental-type cheese produced early and late (ED and LD) in the production day.
